# Supplementary material
Source: Springer Nature journal article supplement (https://www.springermedizin.de/resource/supplementary/12958_2011_979_MOESM3_ESM.pdf/9566486)

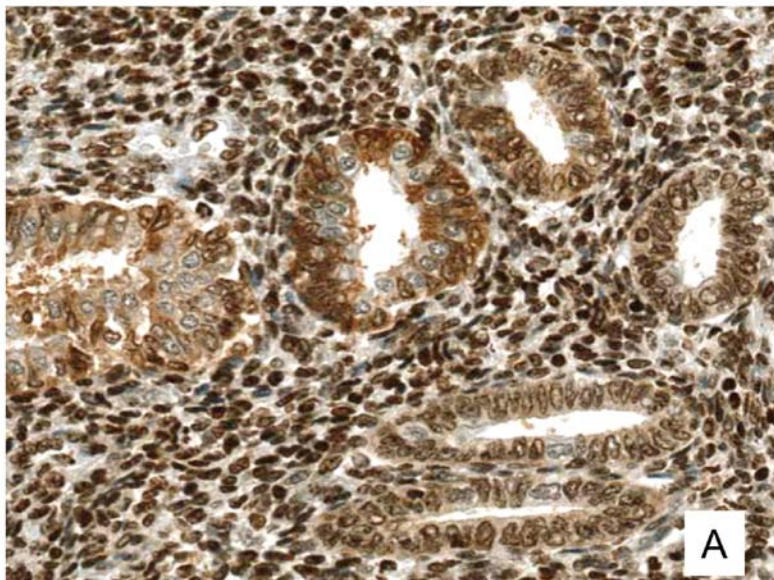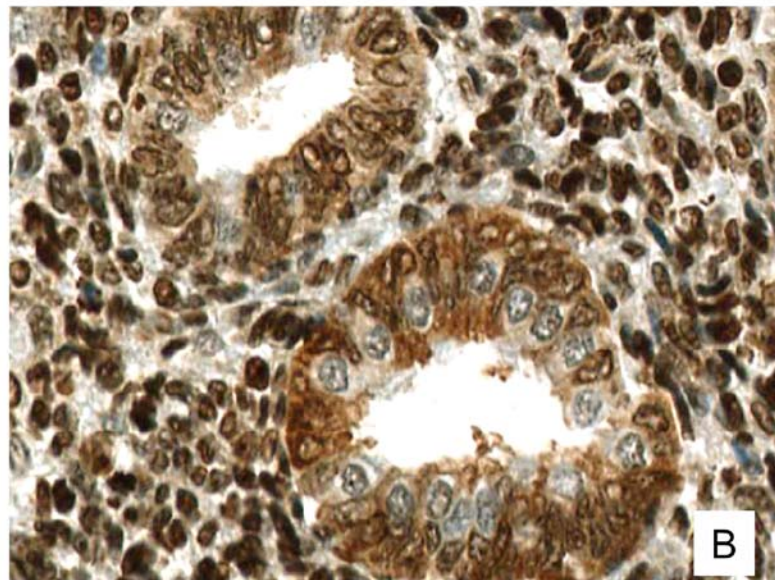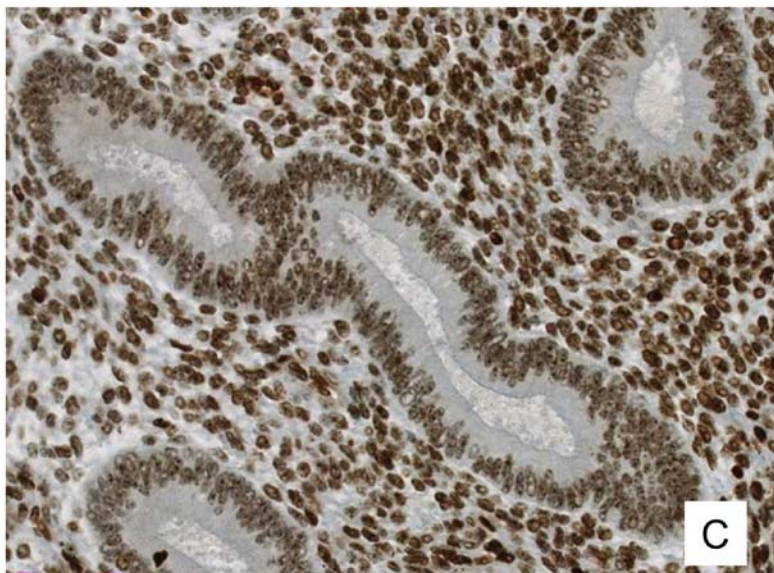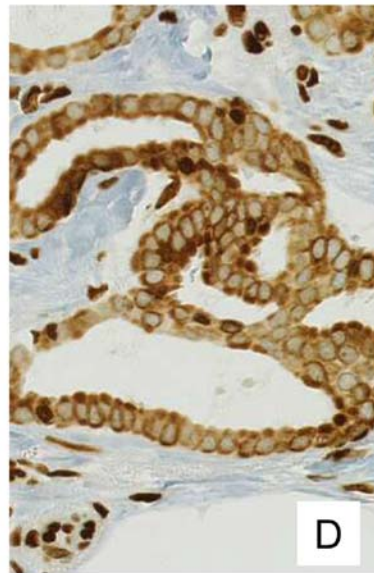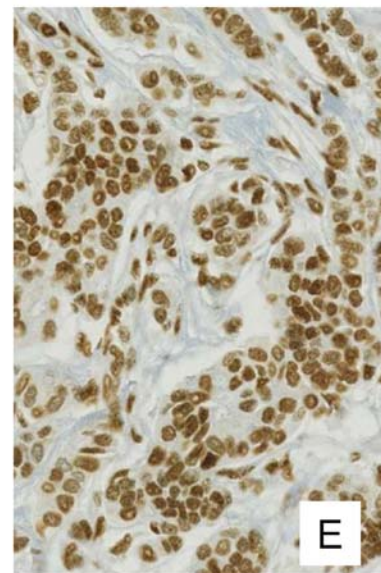

Figure 3

Supplement: MOESM3 [file 9566486]
